# Supplementary material for: Investigation of K3V2(PO4)3/C nanocomposites as high-potential cathode materials for potassium-ion batteries
Source: Royal Society of Chemistry journal article supplement (doi:10.1039/c6cc10065a), 2017-01-01
Supplement: c6cc10065a1.pdf [file c6cc10065a1.pdf]

## Supporting Information

### Investigation of $\text{K}_3\text{V}_2(\text{PO}_4)_3/\text{C}$ nanocomposite as high-potential cathode materials for potassium-ion batteries

Jin Han,<sup>a,b</sup> Guan-Nan Li,<sup>a</sup> Feng Liu,<sup>a,b</sup> Minqiang Wang,<sup>a,b</sup> Yan Zhang,<sup>a,b</sup> Linyu Hu,<sup>a,b</sup> Chunlong Dai,<sup>a,b</sup> and Maowen Xu<sup>a,b\*</sup>

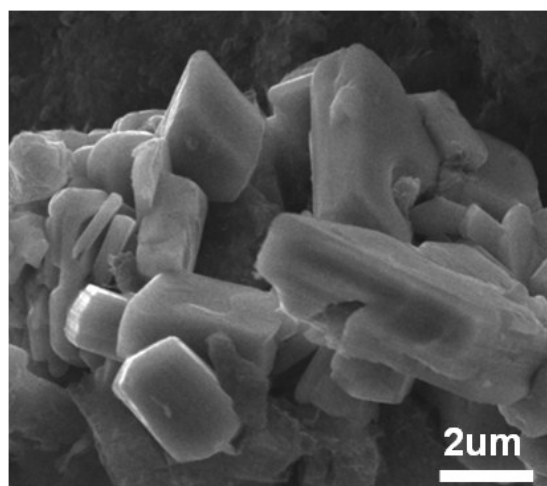

Fig. S1. SEM images of the bulk  $\text{K}_3\text{V}_2(\text{PO}_4)_3$ .

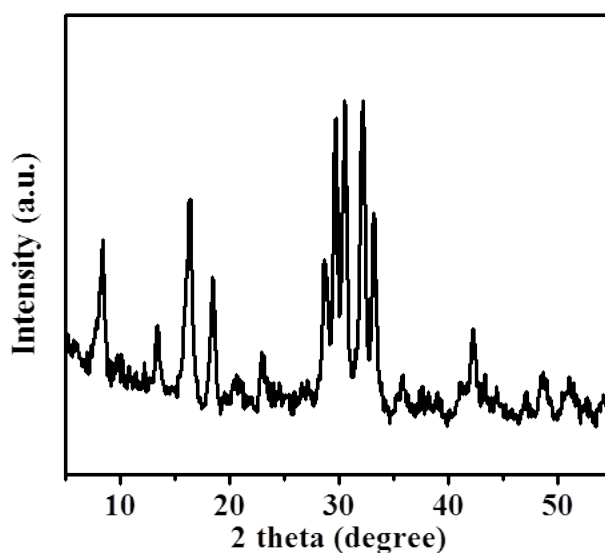

Fig. S2. XRD of the bulk  $\text{K}_3\text{V}_2(\text{PO}_4)_3$ .

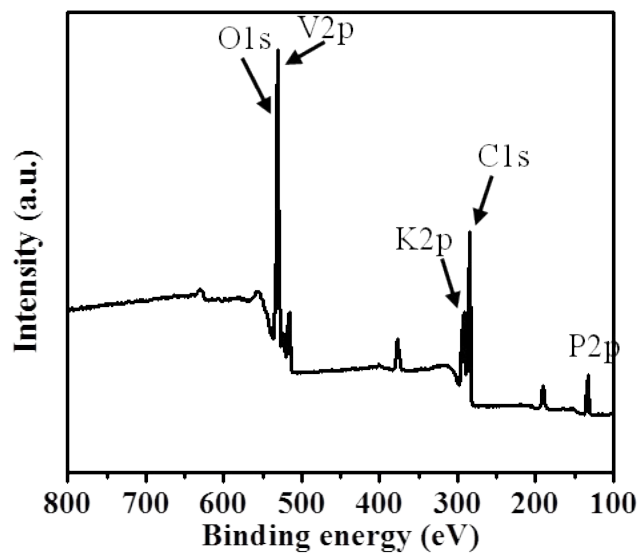

Fig. S3. XPS of  $\text{K}_3\text{V}_2(\text{PO}_4)_3/\text{C}$  before cycle.

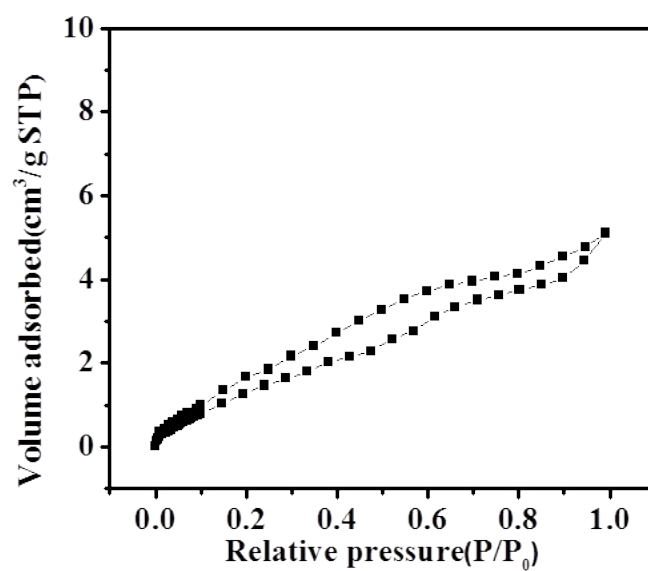

Fig. S4.  $\text{N}_2$  adsorption-desorption isotherms of the bulk  $\text{K}_3\text{V}_2(\text{PO}_4)_3$

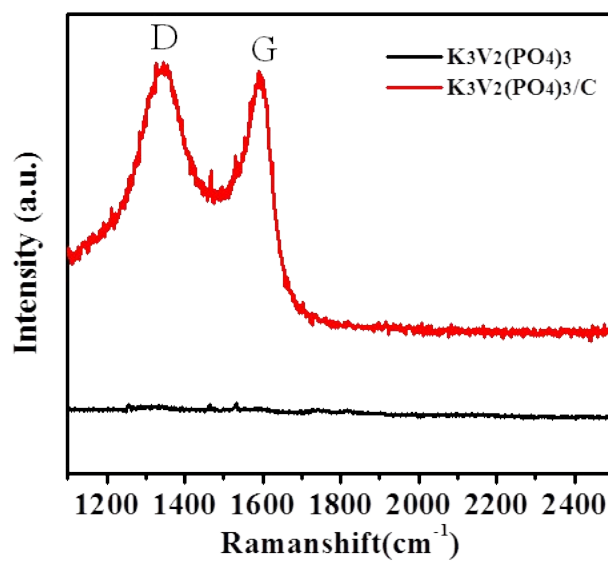

Fig. S5. Raman spectra of the bulk  $\text{K}_3\text{V}_2(\text{PO}_4)_3$  and the  $\text{K}_3\text{V}_2(\text{PO}_4)_3/\text{C}$ , respectively;

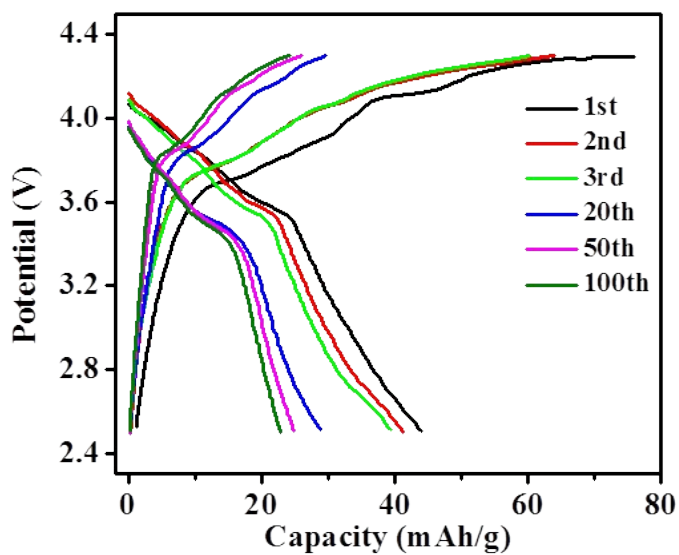

Fig. S6. The different discharge/charge curves of the bulk  $\text{K}_3\text{V}_2(\text{PO}_4)_3$  at the current density of  $20 \text{ mA g}^{-1}$  in the voltage range of  $2.5 \sim 4.3 \text{ V}$  versus  $\text{K}^+/\text{K}$ ;

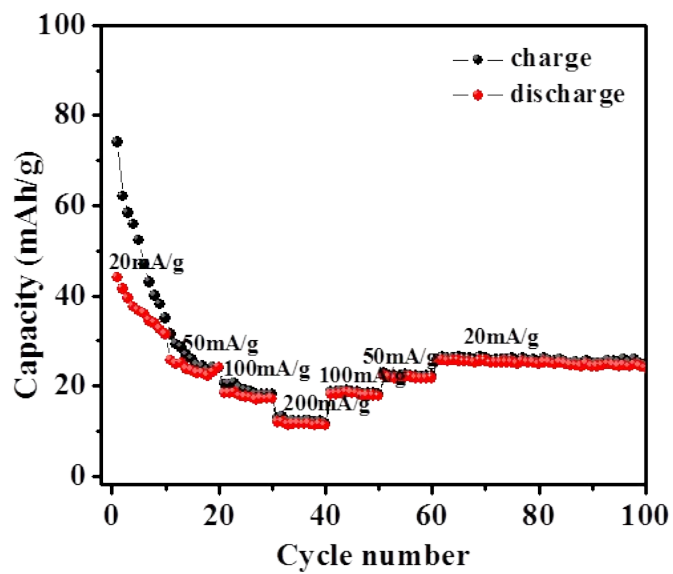

Fig. S7. Rate capability of the bulk  $K_3V_2(PO_4)_3$  at the different current density;

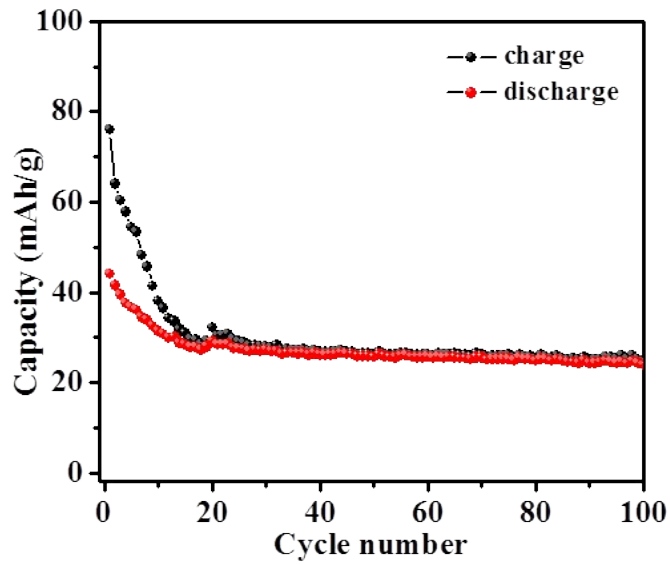

Fig. S8. Cycling performance of the bulk  $K_3V_2(PO_4)_3$  at the current density of 20mA g<sup>-1</sup>.

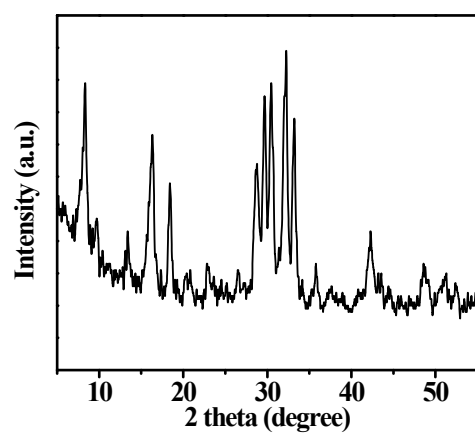

Fig. S9. XRD of the bulk  $\text{K}_3\text{V}_2(\text{PO}_4)_3$  electrode after 20 cycles.

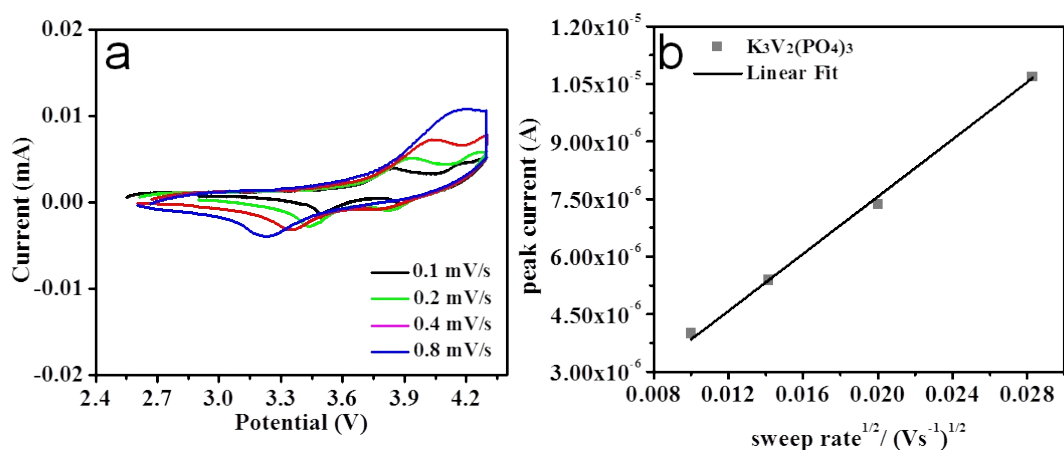

Fig. S10. CV curves of the bulk  $\text{K}_3\text{V}_2(\text{PO}_4)_3$  at various scan rates from 0.1 to 0.8  $\text{mV s}^{-1}$ , respectively; (d) The absolute value of oxidized peak currents vs. the square root of the scan rate plots for the  $\text{K}_3\text{V}_2(\text{PO}_4)_3$ .

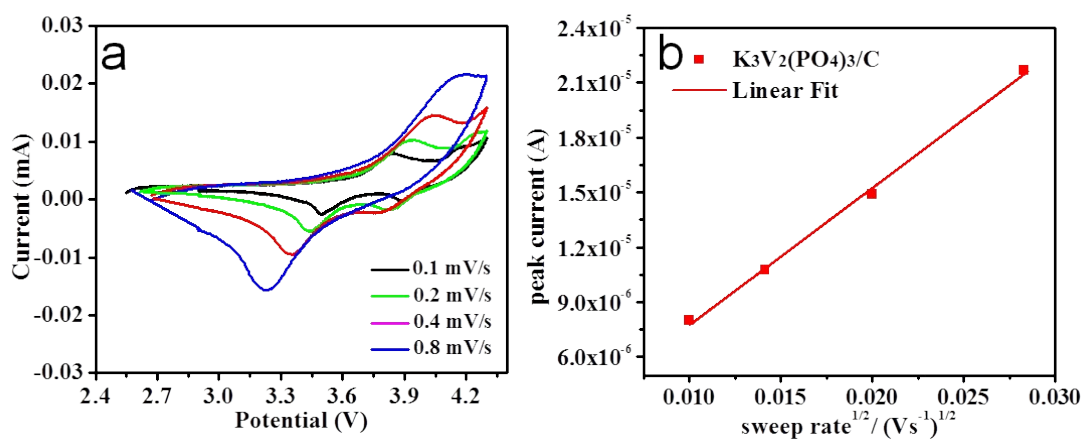

Fig. S11. (a) CV curves of the  $\text{K}_3\text{V}_2(\text{PO}_4)_3/\text{C}$  at various scan rates from 0.1 to 0.8  $\text{mV s}^{-1}$ , respectively; (b) The absolute value of oxidized peak currents vs. the square root of the scan rate plots for the  $\text{K}_3\text{V}_2(\text{PO}_4)_3/\text{C}$ ;

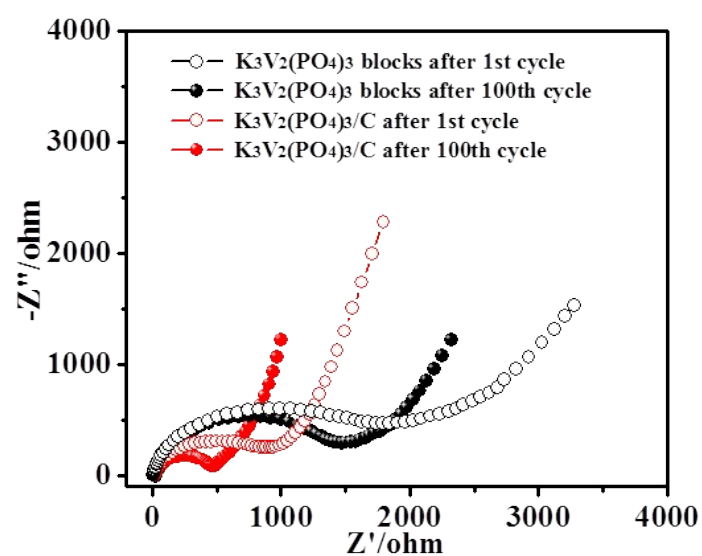

Fig. S12. EIS of the electrodes of the bulk  $\text{K}_3\text{V}_2(\text{PO}_4)_3$  and the  $\text{K}_3\text{V}_2(\text{PO}_4)_3/\text{C}$  after 1 cycles and after 100 cycle, respectively.
